# Supplementary material
Source: PubMed Central journal article supplement (PMC6869523)
Supplement: HBM-36-2527-s001.pdf [file HBM-36-2527-s001.pdf]

Supplementary Fig. 1 : Main effects of Session and Stimulus type

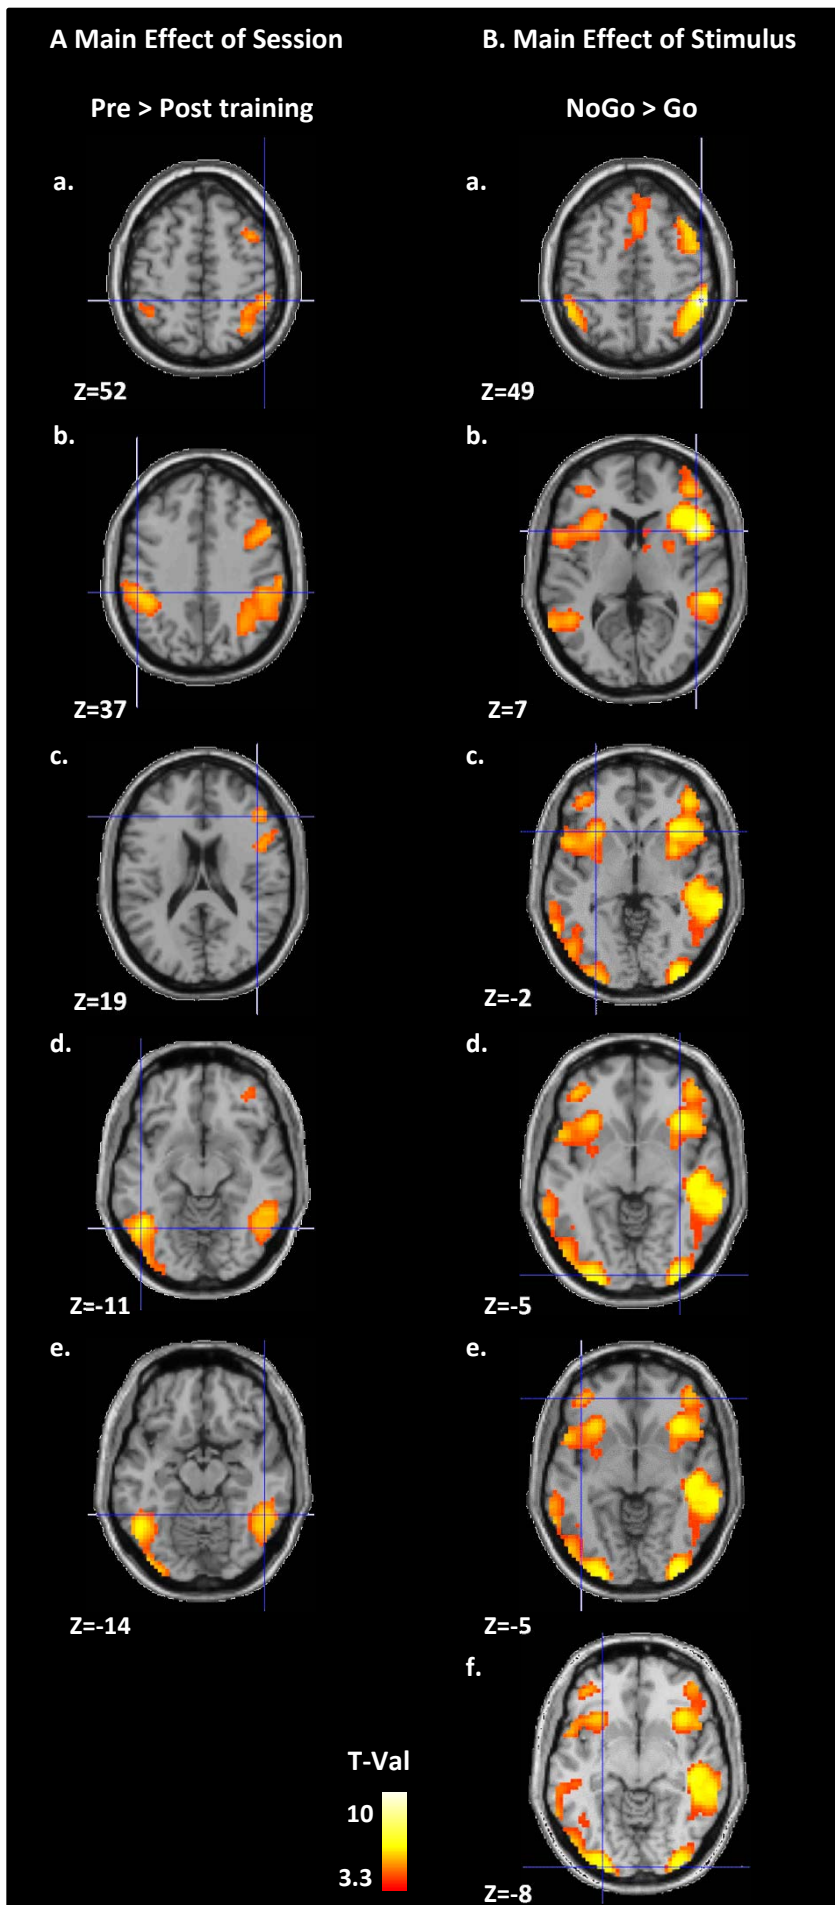

**Supplementary Fig. 1**

Figure1: Functional neuroimaging results for the two main effects of the second level ANOVA. A: main effect of the stimulus type given by the Nogo > Go contrast B: Main effect of session given by the Pre > Post training contrast. Results are presented on a normalized single-subject brain in the MNI space. Contrasts are represented at  $p < 0.001$  uncorrected at voxel level and FDR corrected at the cluster level (min cluster size = 100).

**Supplementary Table 1. Clusters Local Maxima for the functional MRI main effects of the Go/NoGo**

| Anatomical region                         | Vx   | MNI Coordinates |     |     | Z    | p       |
|-------------------------------------------|------|-----------------|-----|-----|------|---------|
| <b>Main effect Session (Pre &gt;Post)</b> |      |                 |     |     |      |         |
| a.                                        |      |                 |     |     |      |         |
| Right inferior parietal                   | 744  | 51              | -40 | 52  | 4.79 | < 0.001 |
| Right angular gyrus                       |      | 33              | -64 | 46  | 4.65 | < 0.001 |
| Right supramarginal gyrus                 |      | 51              | -34 | 37  | 4.46 | < 0.001 |
| b.                                        |      |                 |     |     |      |         |
| Left inferior parietal                    | 337  | -51             | -34 | 37  | 4.69 | < 0.001 |
| Left supramarginal gyrus *                |      | -42             | -40 | 34  | 4.65 | <0.001  |
| Left inferior parietal                    |      | -39             | -49 | 52  | 3.54 | < 0.001 |
| c.                                        |      |                 |     |     |      |         |
| Right middle frontal                      | 607  | 45              | 32  | 19  | 4.43 | < 0.001 |
| Right inferior frontal pars opercularis   |      | 51              | 14  | 37  | 4.23 | < 0.001 |
| Right middle frontal pars orbitalis       |      | 39              | 47  | -8  | 4.16 | < 0.001 |
| d.                                        |      |                 |     |     |      |         |
| Left inferior temporal                    | 329  | -48             | -61 | -11 | 5.72 | < 0.001 |
| Left cerebellum *                         |      | -33             | -94 | -17 | 4.97 | <0.001  |
| Left cerebellum *                         |      | -42             | -85 | -14 | 4.37 | <0.001  |
| e.                                        |      |                 |     |     |      |         |
| Right inferior temporal                   | 248  | 51              | -49 | -14 | 4.70 | < 0.001 |
| <b>Main effect Stimulus (NoGo &gt;Go)</b> |      |                 |     |     |      |         |
| a.                                        |      |                 |     |     |      |         |
| Right inferior parietal                   | 1997 | 54              | -40 | 49  | Inf. | < 0.001 |
| Right inferior parietal                   |      | 54              | -49 | 40  | 6.68 | < 0.001 |
| Right insula *                            |      | 45              | -28 | -8  | 6.47 | < 0.001 |
| b.                                        |      |                 |     |     |      |         |
| Right inferior frontal pars opercularis   | 2905 | 48              | 14  | 7   | 7.18 | < 0.001 |
| Right insula                              |      | 33              | 20  | 1   | 6.55 | < 0.001 |
| Right middle frontal                      |      | 42              | 26  | 43  | 5.69 | < 0.001 |
| c.                                        |      |                 |     |     |      |         |
| Left insula                               | 561  | -30             | 20  | -2  | 5.10 | < 0.001 |
| Left inferior frontal pars opercularis    |      | -51             | 11  | 1   | 4.94 | < 0.001 |
| Left putamen                              |      | -30             | -1  | -2  | 3.74 | < 0.001 |
| d.                                        |      |                 |     |     |      |         |
| Left cerebellum *                         | 1676 | -33             | -94 | -17 | 6.49 | <0.001  |
| Left inferior occipital                   |      | -27             | -97 | -8  | 6.34 | < 0.001 |
| Left inferior parietal                    |      | -57             | -49 | 40  | 6.20 | < 0.001 |
| e.                                        |      |                 |     |     |      |         |
| Left inferior frontal pars orbitalis      | 176  | -42             | 44  | -5  | 4.63 | < 0.001 |
| Left inferior frontal pars triangularis   |      | -36             | 44  | 10  | 3.72 | < 0.001 |
| Left middle frontal                       |      | -36             | 41  | 19  | 3.66 | < 0.001 |
| f.                                        |      |                 |     |     |      |         |
| Right inferior occipital                  | 173  | 36              | -94 | -5  | 6.54 | < 0.001 |
| <b>Main effect Stimulus (Go &gt;NoGo)</b> |      |                 |     |     |      |         |
| Right precuneus                           | 2688 | 12              | -55 | 7   | 5.87 | < 0.001 |
| Left lingual gyrus                        |      | -9              | -67 | 1   | 5.55 | < 0.001 |
| Left calcarine                            |      | -12             | -73 | 19  | 5.44 | < 0.001 |

Supplementary Table 1: Stereotaxic brain MNI coordinates for peak-voxels of the two functional main effects Stimulus (A) and Session (B). No significant difference was found for the main effect of Session (Post>Pre). Results are represented at  $p < 0.001$  uncorrected at voxel level and FDR corrected at the cluster level (min cluster size = 100). Table is organized by activation clusters with 3 local maxima more than 8mm apart. Vx= voxel size, Z= Z-value and p= p-value of the voxel. An asterisk (\*) indicates the nearest grey matter for these particular peaks.

Supplementary Fig. 2 : Main effects of the 2-back task

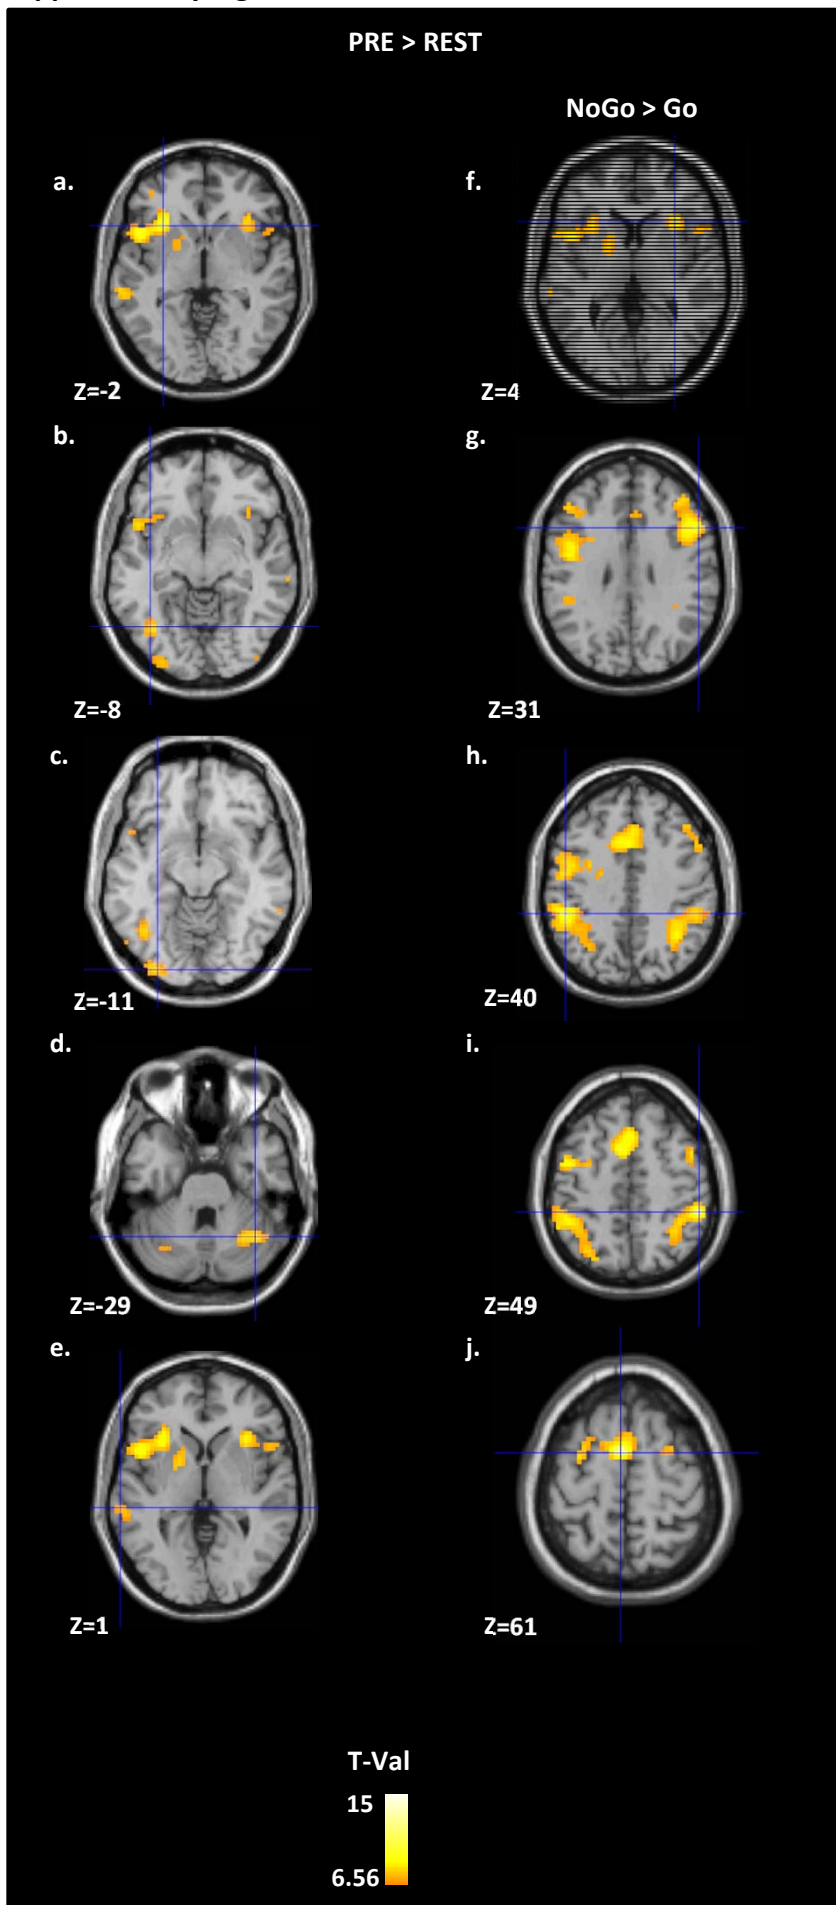

**Supplementary Fig. 2:** Functional neuroimaging results for the main effect of the 2-back. The contrast results from a one sample t-test comparing responses during the 2-back of the pre-training session to the rest. Results are presented on a normalized single-subject brain in the MNI space. Contrasts are represented at  $p < 0.05$  FWE corrected.

**Supplementary Table 2. Clusters Local Maxima for the functional MRI main effects of the 2-back**

| Anatomical region                         | Vx  | MNI Coordinates |     |     | Z    | p      |
|-------------------------------------------|-----|-----------------|-----|-----|------|--------|
| <b>Main effect Session (Pre &gt;Post)</b> |     |                 |     |     |      |        |
| a.                                        |     |                 |     |     |      |        |
| Left insula                               | 843 | -30             | 20  | -2  | 6.11 | < 0.05 |
| Left precentral gyrus                     |     | -48             | 14  | -2  | 6.00 | < 0.05 |
| Left precentral gyrus *                   |     | -45             | -1  | 52  | 5.74 | < 0.05 |
| b.                                        |     |                 |     |     |      |        |
| Left inferior occipital                   | 46  | -39             | -64 | -8  | 5.33 | < 0.05 |
| c.                                        |     |                 |     |     |      |        |
| Left inferior occipital                   | 37  | -30             | -91 | -11 | 5.35 | < 0.05 |
| d.                                        |     |                 |     |     |      |        |
| Right cerebellum                          | 57  | 39              | -58 | -29 | 5.37 | < 0.05 |
| Right cerebellum                          |     | 48              | -58 | -26 | 5.04 | < 0.05 |
| e.                                        |     |                 |     |     |      |        |
| Left middle temporal                      | 26  | -63             | -31 | 1   | 5.09 | < 0.05 |
| f.                                        |     |                 |     |     |      |        |
| Right insula                              | 83  | 33              | 23  | 4   | 5.69 | < 0.05 |
| g.                                        |     |                 |     |     |      |        |
| Right inferior frontal pars opercularis   | 385 | 54              | 17  | 31  | 5.86 | < 0.05 |
| Right inferior frontal pars triangularis  |     | 45              | 20  | 28  | 5.69 | < 0.05 |
| Right middle frontal                      |     | 48              | 41  | 22  | 5.2  | < 0.05 |
| h.                                        |     |                 |     |     |      |        |
| Left inferior parietal                    | 378 | -48             | -37 | 40  | 6.14 | < 0.05 |
| Left superior parietal                    |     | -27             | -73 | 49  | 5.03 | < 0.05 |
| Left superior parietal                    |     | -33             | -67 | 49  | 4.97 | < 0.05 |
| i.                                        |     |                 |     |     |      |        |
| Right inferior parietal                   | 294 | 54              | -37 | 49  | 6.79 | < 0.05 |
| Right inferior parietal                   |     | 36              | -55 | 43  | 6.34 | < 0.05 |
| Right superior parietal                   |     | 42              | -43 | 55  | 6.20 | < 0.05 |
| j.                                        |     |                 |     |     |      |        |
| Left supplementary motor area             | 403 | -3              | 2   | 61  | 6.61 | < 0.05 |
| Left supplementary motor area             |     | 0               | 20  | 49  | 5.69 | < 0.05 |
| Left frontal medial superior              |     | -6              | 17  | 40  | 5.53 | < 0.05 |

Supplementary Table 2: Stereotaxic brain MNI coordinates for peak-voxels of the functional main effect for the 2-back task. Results are represented at  $p < 0.05$  FWE corrected. Table is organized by activation clusters with 3 local maxima more than 8mm apart. Vx= voxel size, Z= Z-value and p= p-value of the voxel. An asterisk (\*) indicates the nearest grey matter for these particular peaks.
